# Supplementary material for: Heat Stress Affects H3K9me3 Level at Human Alpha Satellite DNA Repeats
Source: PubMed Central journal article supplement (PMC7348797; doi:10.3390/genes11060663), 2020-06-18
Supplement: genes-11-00663-s001.pdf [file genes-11-00663-s001.pdf]

## **Heat stress affects H3K9me3 level at human alpha satellite DNA repeats**

**Isidoro Feliciello<sup>1,2\*</sup>, Antonio Sermek<sup>1</sup>, Željka Pezer<sup>1</sup>, Maja Matulić<sup>3</sup> and Đurđica Ugarković<sup>1\*</sup>**

<sup>1</sup>Department of Molecular Biology, Ruđer Bošković Institute, Bijenička 54, HR-10000 Zagreb, Croatia

<sup>2</sup>Dipartimento di Medicina Clinica e Chirurgia, Università degli Studi di Napoli Federico II, via Pansini 5, I-80131 Napoli, Italy

<sup>3</sup>Department of Biology, Faculty of Science, University of Zagreb, HR-10000 Zagreb, Croatia

**\*Corresponding authors:** I. Feliciello, phone: +39 3495250441, e-mail: ifelicie@unina.it;

Đ. Ugarković, phone: +385 1 4561197, fax: +385 1 4561177, e-mail: ugarkov@irb.hr;

**Figure S1A.** Polymorphism of alpha satellite repeat No 29 located within intron of *ZNF675* gene among human cell lines: 1. MJ90 hTERT, 2. 697, 3. MCF-7, 4. HT29, 5. HeLa, 6. Hep2, 7. SW620, 8. SW48, 9. DLD1, 10. HCT116, 11. ZR75, 12. HepG2, 13. A431, 14. 293T, as well as Cal 27 and OV-90. The AR 29 corresponds to 0.6 of alpha satellite monomer length and is homozygous in all tested cell lines except Cal 27 and OV-90 where it is absent, as revealed by sequencing (Figure S1B). The element No 29 with the flanking region was amplified by PCR using specific primers and the products were separated on agarose gel. Three different DNA isolations from Cal 27 and two from OV-90 cells were tested for the polymorphism of AR 29. M=marker, NC= negative control.

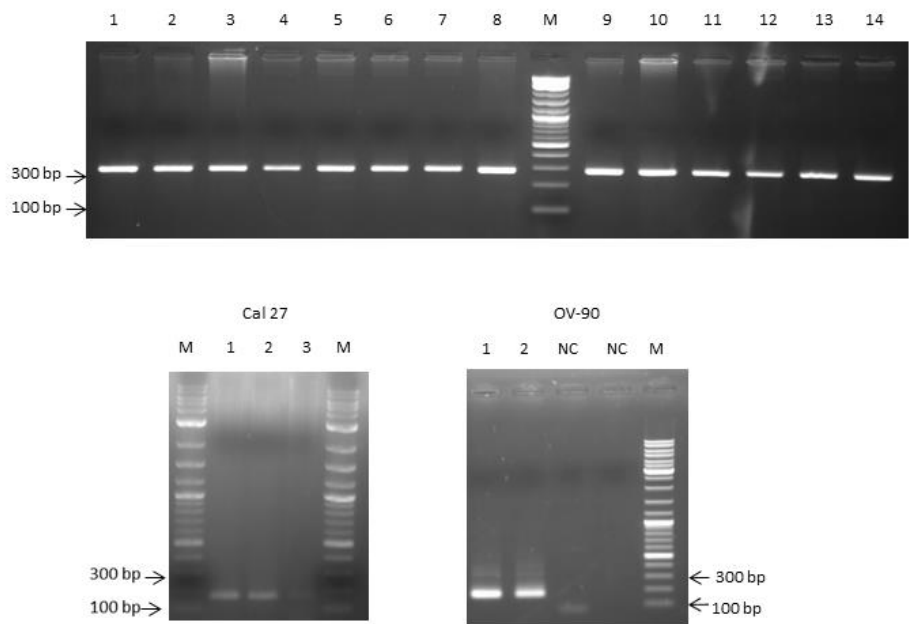

**Figure S1B.** DNA sequence of a short amplicon within intron of *ZNF675* gene in Cal27 and OV-90 cell line is aligned with the same locus encompassing alpha repeat 29 in MJ90 hTERT cell line. Alpha satellite repeat is marked with red and is completely deleted in Cal27 and OV-90 cells. Position of primers is underlined. *Alu* repeat sequence in which alpha repeat is embedded is marked with blue.

```

ZNF675 MJ90      GCTTACCTTGGCTTCTCAAAGTGCTGGGATTACAGGTGTGAGCCACTATTCCCCGCCCTT
ZNF675 Cal27    GCTTACCTTGGCTTCTCAAAGTGCTGGGATTACAGGTGTGAGCCACTATTCCCAG-----
                *****

ZNF675 MJ90      TTTTTTTTTCATTTTTCTACACATTTTACTTGTGTTGTATTTCTATAGTCTTCTAATGTAG
ZNF675 Cal27    -----TTGCTTTTTTAAAAAAGTTTTTT-----
                * * * * * * * * * *

ZNF675 MJ90      TCTTGA AATTATAAAGGGCTGGGCATCGGCTCAAGGGCCAGGCACGGTGGCTCAGCCTG
ZNF675Cal27    -----GGGTCGGGCCGGGTGGCTCAGCCTG
                * * * * *

ZNF675 MJ90      TAATCCAGCACTTTGGGAGGCTGAGGTGGGCGGATCAGGAGGTCAGATAAAAACTAGAA
ZNF675Cal27    TAATCCAGCACTTTGGGAGGCCGAGGTGGGTAGATCAGGAGGTCAG-----
                *****

ZNF675 MJ90      AGAAGCTTCTGAGAACTGCTTTGTGATGTGTGCATTCATCTCACAGAGATAAATCTTT
ZNF675Cal27    -----GAG-----
                * * *

ZNF675 MJ90      CTTTGGATTGAGCAGTTTGGAAACCTGGCTAACATGGTGAAACCCGGTGTCTACTA
ZNF675Cal27    --TTCGATAC-----CAGCCTGGCCAACATGGTGAAACCCGGTGTCTACTA
                * * * * * * * * * *

```

**Figure S1C.** Sequence of a part of intron of *NR3C1* gene in HepG2 cells encompassing heterozygous alpha satellite element No 10 which is indicated in red. Alpha element is present on a single allele (long) and absent from another one (short). The position of PCR primers is underlined and allele specific primers are additionally marked in yellow and green. *Alu* repeat sequence adjacent to alpha repeat is marked in blue.

```

Short      ACAGGGATATGAAACTCTAACTTATAACTAGTTTCAGGTTTCTTTTTTTTTTTTTTTTTT-CCAAGAC
Long      ACAGGGATATGAAACTCTAACTTATAACTAGTTTCAGGTTTTCTTTTTTTTTTTTTTTTTTTTCCAAGAC
          *****

Short      GGAGTCTTACTCTGTGCGCCAAGCTGGAGTACAGTGTGTGATCTCGGCTCACTGCAACC
Long      GGAGTCTTGTCTGTGCGCCAAGCTGGAGTACAGTGGTGTGATCTCGGCTCACTGCAACC
          *****

Short      TCTGCCTCCCGGTTCAAGTGATTCTCCTGCCTCAGCCTCCTGAGTAGCTGGGACTACAG
Long      TCTGCCTCCCGGTTCAAGTGATTCTCCTGCCTCAGCCTCCTGAGTAGCTGGGACTACAG
          *****

Short      GTGACACCACCACGCTCCGCTAATTTTTGTATTGTTAGTAGAGACAGGGTTTCACCATG
Long      GTGACACCACCACGCTCCGCTAATTTTTGTGTTTTTAGCAGAGACAGGGTTTCACCATG
          *****

Short      TTGGCCAGGCTGGTCTCAA-CTCCTGACCTTGATGATCCGCCCACCTCAGCCTCCCAAAT
Long      TTAGCCAGGATGATCTTGATCTCTTGACCTCGTGATCCGCCTGCCTTGGTCTCCCAAAGT
          ** *****

Short      GCTGGGA-----
Long      GCGGGGAGACCAAGAACTTTCTCAGAACTTCTCACTGTTGTGTGCATTCAGGTCATGG
          ** ****

Alpha-sat insertion
Long      AGTTGAACGTTTCTTTTGATTGAGCAGTTTTTCAAACACTCATTTTATAGAATCTGCAAG
Long      TGGATATTTGGAGCGCTTTGAGGCTACGGTGGAAAAGGTAATATCTTCACATAAAAAC
Long      AGACAGAAGGATTCTCAGAACTTCAGGGA

Short      TTATAGGTGTGAGCCATCGTGCCTGGCCCCCTAATATATATCTTATAGGAGTCCAGAAA
Long      TTACAGGCGTGAGCCACTGCACCCGGCCC---AGGTTTCTTCTT-TAC---TT---GAAA
          *** ** ***** * ** ***** * ** * ** ** * ** ** **

Short      CACCAAACAAAACCCATCCAGTTCTTCCTT
Long      CACCAAACAAAACCCATCCAGTTCTTCCTT
          *****

```

**Figure S2.** Consensus sequence of 171 bp alpha satellite monomer [29] and position of primers used in qPCR.

CATTCTCAGAACTTCTTTGTGATGTGTGCATTCAACTCACAGAGTTGAACCTTCCTTTTCATAGAGCAGTTTTG  
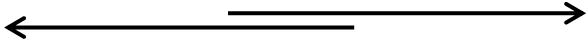

AAACTCTTTTTGTAGAATCTGCAAGTGGATATTTGGACCGCTTTGAGGCCTACGGTGGAAACGGAAATATCT

TCATATAAAAAGTAGACAGAAG

**Figure S3:** Organization of repetitive sequences at intronic regions of genes *NR3C1*, *ZNF675* and *PLA2G12B*, flanking alpha repeats (ARs) 10, 29 and 19, respectively. ARs are indicated with pink star and regions used for ChIP-qPCR analysis are indicated with red lines. Regions 6 kb distant to ARs are not shown. Repetitive sequences were identified by RepeatMasker and the analysis was performed by UCSC Genome Browser (<https://genome.ucsc.edu/>).

### AR 10

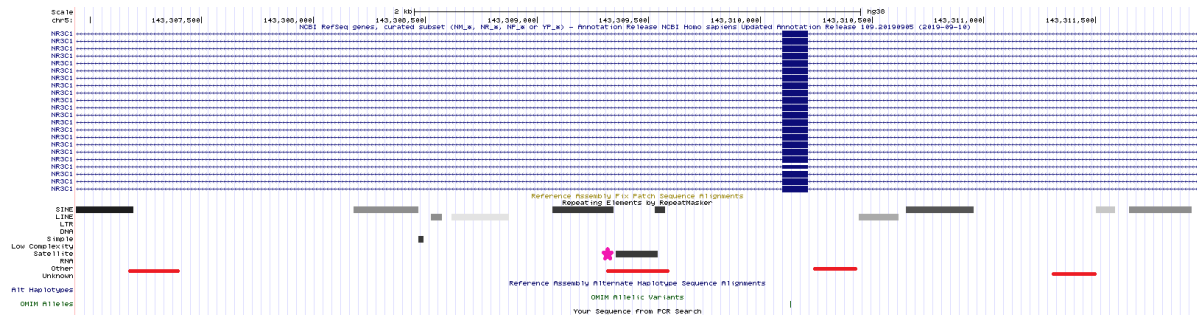

### AR 29

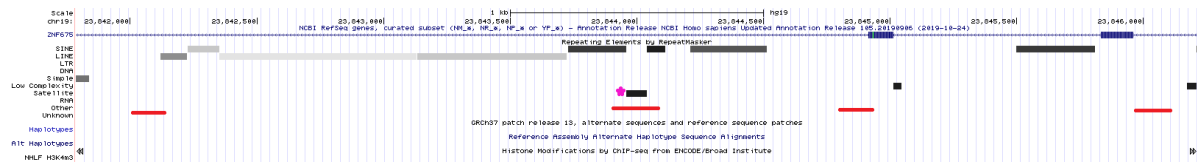

### AR 19

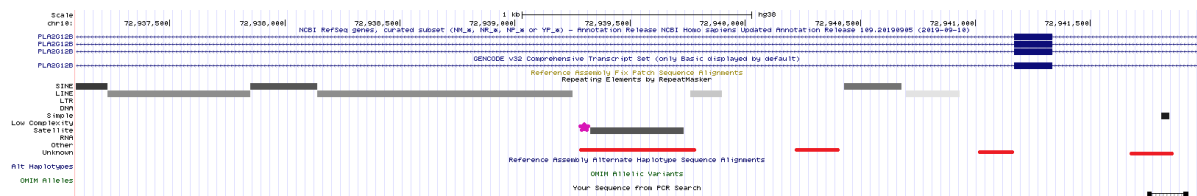

**Figure S4.** H3K9me3 level in HeG2 cells at intronic alpha satellite repeats (ARs) No 1, 14, 18, 19, 21, 25, 28, 31, and at intronic regions positioned 2-6 kb from each of the AR, either at 5' or 3' site. H3K9me3 levels were measured by ChIP coupled by quantitative real-time PCR at standard conditions (no HS), immediately after 2 hrs of HS (0 min) and at 30 min of recovery (30 min). No value was normalized using No value of input fraction and represents the H3K9me3 level. Columns show average of three independent experiments and error bars indicate the standard deviations.

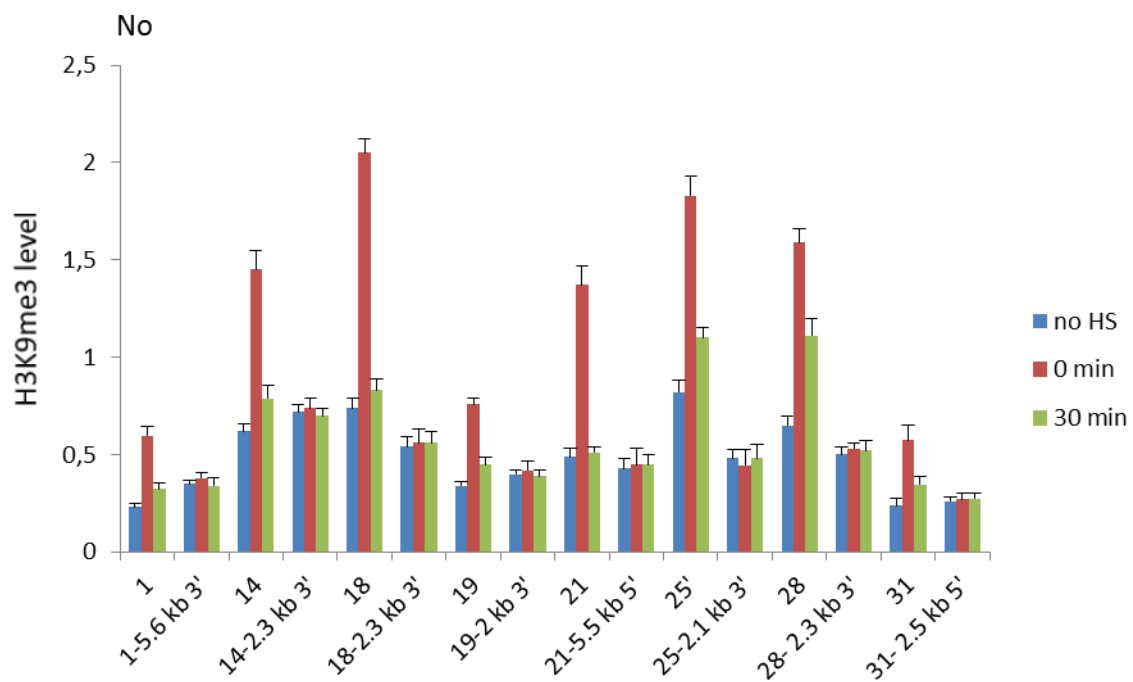

**Figure S5.** H3K4me2/3 level at tandemly arranged alpha satellite repeats characteristic for heterochromatin (Alpha) and at intronic and intergenic ARs in MJ90 hTERT cells. H3K4me2/3 levels were measured by ChIP coupled by quantitative real-time PCR at standard conditions (no HS), immediately after 2 hrs of HS (0 min) and at 30 min of recovery (30 min). No value was normalized using No value of input fraction. Columns show average of three independent experiments and error bars indicate the standard deviations.

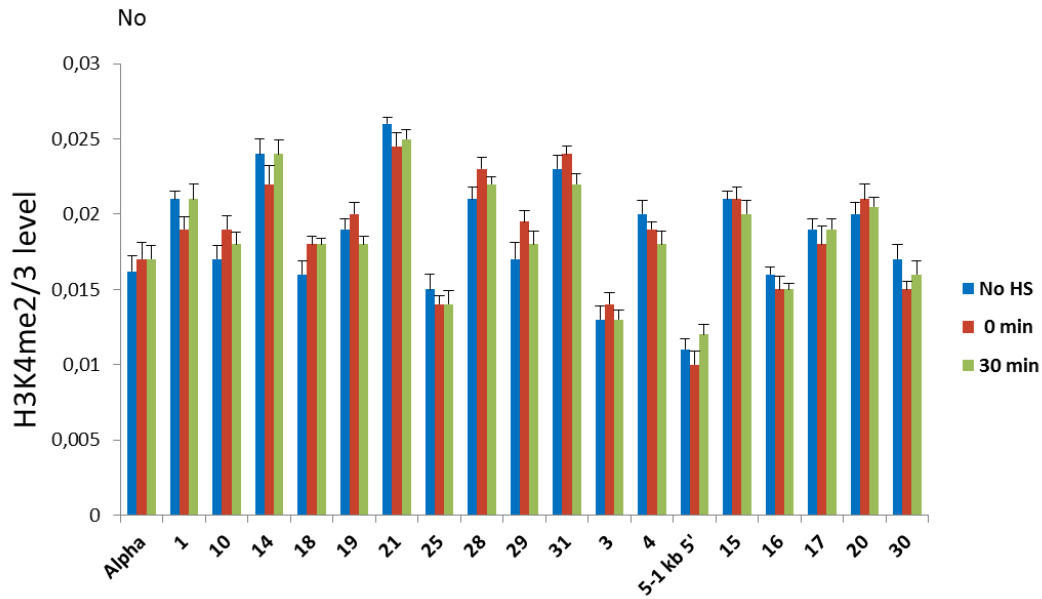



**Figure S6.** Dynamics of expression of *VAV1* gene associated with dispersed alpha satellite repeat 28 in cell line 697 under standard conditions (no HS), after 1 hr of heat stress (0 min), and at 30 min and 1 hr of recovery. No represents normalized average No value, columns show average of two different qRT-PCR experiments performed in triplicate and error bars represent standard deviations.

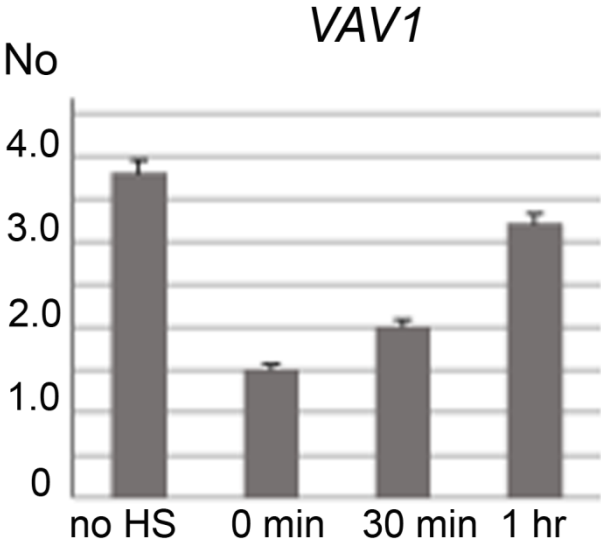

**Table S1.** List of primers used for analysis of alpha repeat insertion polymorphism and in ChIP-qPCR experiments.

| Alpha repeat No – distance from AR | Primers fw              | Primers rev               |
|------------------------------------|-------------------------|---------------------------|
| 1                                  | GCCTCCTGAGTTCAAGCAAC    | GCATGGTGCCTCATTCTAT       |
| 1- 5654 bp 3'                      | GGATTACAGATGTGAGCCACTG  | TGGCATTTAATCTACGGTTGG     |
| 2                                  | CCACAAATGGGCCCTGTTA     | GGGAACATCACACTCTGGGG      |
| 3                                  | AGGGCTCAGATTTAGGGATTT   | AACCCATAAGGAAGCCAGT       |
| 3-2763 bp 3'                       | GACATTTTATGCCAGAACGGTA  | TCTACCTGGGTTGGCTGTC       |
| 4                                  | CCAGACCACGGTAAATGCCA    | GACGGATGGCAGAACAAACG      |
| 4- 1926 bp 5'                      | AGCCACATGTTTGAATGAACC   | TCCTCAGGAATCCACTATTCCG    |
| 5                                  | ACAGCAGTGACTCTGAGCCA    | AATAGCCTGTTCTTCTGAAGC     |
| 5-1045 bp 5'                       | AGGGGCCATGTTTTCTCAG     | CATCTGGTGGAGGAAGCAGG      |
| 5-2427 bp 3'                       | GGAAGAGCGATTCCAACCTCA   | TAATGCATGGTGGTGCTGTT      |
| 10                                 | ACAGGGATATGAAACTCTAC    | AAGGAAGAACTGGATGGG        |
| 10- 636 bp 3'                      | CAATCATTCTTCCAGCACA     | GGCAATACCTGTGGGTGTCT      |
| 10- 1778 bp 3'                     | AATCACCCACTGCTAAAAATGAA | GAAGGTACATTGCCTCTGATCC    |
| 10- 1891 bp 5'                     | GCCTGGGGTCGTCTTCTAGT    | ATGAGGGCCTTCTTTCATCA      |
| 10- 6276 bp 5'                     | GGAGCTCCACAGAAGTGTTCA   | TTGTGCTTATTTGGGTCTTCACT   |
| 13                                 | TAGGAAGTGGGAGAGGGCAA    | GACCTGCCCGAAGCTGTAA       |
| 14                                 | GTTCTGTAAAGGGCTCAACG    | AGGCTGCAGTAAGCCATGAT      |
| 14- 2343 bp 3'                     | TGCCTCATGGTCTCTCTGTG    | TTGTGGGGTTGCAGTTATCA      |
| 15                                 | AGTAGTGACTCGTAGGACAC    | CTTAGCCCCGTCAAGTTGAC      |
| 15-2204 bp 5'                      | TGAGCAGAGGGATCTTACCC    | CTTGAAGCAAGAGCACCAT       |
| 16                                 | GGAGTCAGGCAGGTGAGTTC    | CATCACCCATTGGCTGTCT       |
| 16-2232 bp 3'                      | AGCCTGTTCCCTCCAAAGAT    | CCCATCCTGTTTTCTCTGCT      |
| 17                                 | ATGGGGAGGTGATGGGGTTA    | CCCTCACCAGAATTGCCCTT      |
| 17-2310 5'                         | GAACCTGGTTGAGAATTAGTTGG | TACTTGCCCCGTAGGAAATGG     |
| 18                                 | TCCAGTCCATCGAAACCTA     | GAAGCTTCATCACCTCCAA       |
| 18- 2291 bp 3'                     | GGCATGGAGGAGAGTATGGA    | TGGAACACTGCAATTCAAAGA     |
| 19                                 | CTTGGGCATTTCTGGTCTGT    | ATTAGGGCGTTTCACACAGG      |
| 19-497 bp 3'                       | GGTGTGGAGCCAGCTCTTTA    | CACCGACTCTATAATTTCTTTTTCC |
| 19-1264 bp 3'                      | GTGAAGGAGTGCCAGAATC     | GTGCACAGGGAGGTTTGTTT      |
| 19- 2046 bp 3'                     | AAAAATTCAGCTCCGTTCA     | TGGGTGTGTGTGAGATGTTGT     |
| 20                                 | TGCTGCCTACAAAAGACCCA    | TCTGGGCTCACTGCAATCTC      |
| 20-5061 bp 3'                      | TTTTGCTGCCTAACTGAAACA   | TGAAGGACACAATTCACACCA     |
| 21                                 | GCACCACACTGGTCTTCC      | CTGTATTTTACAGCATGAGTGACAG |
| 21-5450 kb 5'                      | CCAATGTTTTTGAGGTTATGG   | TTGGTGTACGTTTAAGAAAGTAGGA |
| 25                                 | CGACATGGGTCCAGTCTGAT    | AGGAATCTGGATATGTCTTCCA    |
| 25- 2096 bp 3'                     | ACTCCCTTCCCTGGTAAACA    | CATCCCACTCATTGCTGACA      |
| 28                                 | AGACTCCATCCCCCTCAAAA    | TCAAGGTGTCAGTAGGGTTGG     |
| 28- 2260 bp 3'                     | ACACCCTGTCTGCTCTGTCC    | TGAGCACTCACTCGATCTGG      |
| 29                                 | GCTTACCTTGGCTTCTCAAAGT  | TAGTAGACACCGGGTTTCACC     |

|                |                        |                          |
|----------------|------------------------|--------------------------|
| 29- 625 bp 3'  | AAGCGGACACTGGTTCTCAC   | GGGAAGCCGTGTTTTAAAGG     |
| 29- 1844 bp 5' | CAAAATGGGTGCAAATCATAGA | CCATTTTCTGTTTCAATTTTGTCT |
| 29- 1890 bp 3' | GGCCACATCCCTAAATGTCA   | CTGGTGTTGTGGCTCTTG TG    |
| 29- 6153 bp 5' | CAGGTGAGCACAATGCAAAG   | TGCTGGGAGTACAGGTGTGA     |
| 30             | CCTGAGTGGGGAGAAAGCTG   | CTGTAGGCCCCAGCTACAAGG    |
| 30 -2250 bp 5' | GTTGCGGGACCTTCCTCT     | CAGCTGCCCTCCAAAAATAG     |
| 31             | CGCTAATGCTGAAGACATGC   | GAAGTGGGAATGGGATCTGAAA   |
| 31- 2425 bp 5' | AATGTTGAGCGGAGATCCAG   | CTCTGCCTGCTGTGTTTGAG     |

**Table S2.** List of primers used for expression of alpha repeat-associated genes and of alpha satellite DNA.

| <b>Gene</b>          | <b>Primers fw</b>              | <b>Primers Rev</b>       |
|----------------------|--------------------------------|--------------------------|
| <i>SLC30A6</i>       | TGATCTTGCTGGAGCATTTG           | AAACATGGGGTGGTGTGTCT     |
| <i>TGFA</i>          | TGTTGCTCTGGGTATTGTG            | ACGTACCCAGAATGGCAGAC     |
| <i>SLC40A1</i>       | AACAAGCACCTCAGCGAGAG           | CACATCCGATCTCCCAAGT      |
| <i>ASNSD1</i>        | CACTGGAATTGGTGACATG            | GTTTGCTTTTTCCCAATCG      |
| <i>ST6GAL1</i>       | TGGGATGCTTGGTATCATCA           | GTGGCTTTTCCAAGCAGGTA     |
| <i>RPL392</i>        | GAGGCGTCTCGGAGTCTCA            | AAATAAAATCGGCGCCTGG      |
| <i>HTRA3</i>         | GAGGCCACCATCAAAGACAT           | GGCATCCGTCTGGATGTAG      |
| <i>ACOX3</i>         | TCCCAACTGCACATACGAAG           | CAGGTAGCAAACCAGCCACT     |
| <i>NR3C1</i>         | AGGCTGGAATGAACCTGGAA           | AACAGTGACACCAGGGTAGG     |
| <i>NR3C1- HepG2-</i> | CACCTCAGCCTCCCAAATGCTGGGATTAT  | AAGGAAGAACTGGATGGG       |
| <i>NR3C1- HepG2+</i> | TGCCTTGGTCTCCCAAAGTGCGGGGAGACC | AAGGAAGAACTGGATGGG       |
| <i>FAM83B</i>        | TCAGTTCAGCGTCTCAGGAA           | ACCATGCTGAGGTGAGCTTT     |
| <i>PRIM2</i>         | TGGACTTAAGTTGGGGTTCG           | CAAAGCCTTGGACAGTTTGG     |
| <i>INTS1</i>         | GTGTCTGTGCTGGCCTGTAA           | CTGGATGTTGTCCACAAACG     |
| <i>MAFK</i>          | CGACTAATCCCAAACCGAAT           | CTCCAGCTCCTCCTTCTGC      |
| <i>PHF20L1</i>       | CTGCAGCCAAGAACAAAACA           | TCTCTGGCTGTGGAAGACC      |
| <i>TG</i>            | TCTATCAGAGACGCCGCTTT           | TTCGAGATTTCTCGCAGGTT     |
| <i>DIP2C</i>         | CCAACCCAGAAACAAAAGGA           | AGGAACCCCAAGTAGCCTGT     |
| <i>STAM</i>          | AACAAAGGCAGCAGTCAACC           | TTGATGGGTTTACCTTTCC      |
| <i>PLA2G12B</i>      | GCAAAATTCGGATGGTGTCT           | TTCCTTCTCCTCCTCTGCAC     |
| <i>OR6A2</i>         | TGATGCACATTCCTTCGGCT           | GCGCAGGCAGTAAATGATGG     |
| <i>OR10A5</i>        | CTACGTGCTCCTCACACCTC           | GGGCTAGGACCTTGTGGAAG     |
| <i>DLG2</i>          | TTGCATGTTACTGTGCACTCC          | CAGAGGAGAAATATGAGACTGCAA |
| <i>MYO1E</i>         | CTGGGAGGAAAGCAGGGTAA           | ACACTTTACTCCTCCCCAGC     |
| <i>ZNF675</i>        | ACACTGCACAGCGGAATTTA           | GGGGTTCATTACCATCTCA      |
| <i>VAV1</i>          | TGCTTCAAGTCTCTGGACACCAC        | TCTCGGGCGCAGAAGTCATA     |
| <i>PPP2R3B</i>       | AGCTGACCGAATTCTTCTCG           | TTTTCTGCCTCGTGTGACTG     |
| <i>MAP7D2</i>        | TTCCTGTTGTGAACCTCGGG           | CCTTCCCTTTCTTGTGCT       |
| Alpha satellite      | TGTGTGCATTCAACTCACAGAG         | TGCACACATCACAAAGAAGTTT   |
| <i>GUSB</i>          | GAAAATATGTGGTTGGAGAGCTCATT     | CCGAGTGAAGATCCCCTTTTAA   |

**Table S3.** List of alpha satellite repeats dispersed on human chromosomes. Genomic positions of repeats (genome assembly GRCh38/hg38), their composition and similarity to consensus alpha satellite sequence is indicated as well as genes associated with each repeat. Alpha satellite elements tested for polymorphism and their associated genes used in expression analyses are indicated in bold.

| chr No | alpha repeat No | Genome position            | Similarity to alpha satellite consensus/size | associated gene                                                                                                                                                           |
|--------|-----------------|----------------------------|----------------------------------------------|---------------------------------------------------------------------------------------------------------------------------------------------------------------------------|
| 2      | <b>1</b>        | <b>32213935-32214051</b>   | <b>82%, 0.7 monomer</b>                      | <b>solute carrier family 30 member 6, (SLC30A6 ID: 55676), intron</b>                                                                                                     |
|        | <b>2</b>        | <b>70431412-70431596</b>   | <b>88%, 0.9 monomer</b>                      | 130438 bp at 5' side: protein FAM136A isoform X1, ID: 84908<br><b>19263 bp at 3' side: TGFA transforming growth factor alpha isoform 2 preproprotein, (TGFA ID: 7039)</b> |
|        | <b>3</b>        | <b>189619699-189619943</b> | <b>77%, 1.4 monomers</b>                     | <b>38888 bp at 5' side: solute carrier family 40 member 1 isoform X1, (SLC40A1 ID: 30061)</b>                                                                             |
|        |                 |                            |                                              | <b>46190 bp at 3' side: asparagine synthetase domain-containing protein 1 isoform X1, (ASNSD1 ID: 54529)</b>                                                              |
| 3      | <b>4</b>        | <b>187105323-187105556</b> | <b>70%, 1.4 monomers</b>                     | <b>29520 bp at 5' side: beta-galactoside alpha-2,6-sialyltransferase 1 isoform b, (ST6GAL1 ID:6480)</b>                                                                   |
|        |                 |                            |                                              | <b>15589 bp at 3' side: 60S ribosomal protein L39-like, (RPL392 ID: 116832)</b>                                                                                           |
| 4      | <b>5</b>        | <b>8342053-8342633</b>     | <b>75%, 3.4 monomers</b>                     | <b>34942 bp at 5' side: HtrA serine peptidase 3, (HTRA3 ID: 94031)</b>                                                                                                    |
|        |                 |                            |                                              | <b>24328 bp at 3' side: peroxisomal acyl-coenzyme A oxidase 3 isoform X4, (ACOX3 ID: 8310)</b>                                                                            |
|        | 6               | 77489446-77489557          | 82%, 0.7 monomer                             | 323522 bp at 5' side: cyclin-G2 isoform X1, ID:901                                                                                                                        |
|        |                 |                            |                                              | 116309 bp at 3' side: C-X-C motif chemokine 13 precursor ID: 10563                                                                                                        |
|        | 7               | 111490801-111491006        | 78%, 1.2 monomer                             | 857833 bp at 5' side: PITX2 paired like homeodomain 2., ID: 5308                                                                                                          |
|        |                 |                            |                                              | 335840 bp at 3' side: ncRNA, ID: 105377368                                                                                                                                |
|        | 8               | 135576694-135576783        | 89%, 0.52 monomer                            | 1375501 bp at 5' side: polyadenylate-binding protein 4-like, ID: 132430                                                                                                   |
|        |                 |                            |                                              | 1944246 bp at 3' side: protocadherin-18 isoform 2 precursor, ID: 54510                                                                                                    |
| 5      | 9               | 100196524-100196622        | 89%, 0.6 monomer                             | 671163 bp at 5' side: putative POM121-like protein 1-like isoform X2, ID:100652833                                                                                        |

|    |           |                            |                          |                                                                                                   |
|----|-----------|----------------------------|--------------------------|---------------------------------------------------------------------------------------------------|
|    |           |                            |                          | 192353 bp at 3' side: putative POM121-like protein 1-like, ID:441098                              |
|    | <b>10</b> | <b>143309356-143309541</b> | <b>88%, 1.1 monomers</b> | <b>nuclear receptor subfamily 3 group C member 1(NR3C1, ID: 2908 ), intron</b>                    |
|    | 11        | 161040048-161040173        | 73%, 0.73 monomer        | 354828 bp at 5' side: probable phospholipid-transporting ATPase VB isoform X3; ID: 23120          |
|    |           |                            |                          | 253908 bp at 3' side: gamma-aminobutyric acid receptor subunit beta-2 isoform 2, ID:2561          |
|    | 12        | 161163077-161163193        | 70%, 0.68 monomer        | 477857 bp at 5' side: probable phospholipid-transporting ATPase VB isoform X3, ID: 23120          |
|    |           |                            |                          | 130888 bp at 3' side: gamma-aminobutyric acid receptor subunit beta-2 isoform 2, ID:2561          |
| 6  | <b>13</b> | <b>54991256-54991369</b>   | <b>74%, 0.7 monomer</b>  | <b>49249 bp at 5' side: protein FAM83B isoform X1; (FAM83B ID: 222584)</b>                        |
|    |           |                            |                          | 183219 bp at 3' side: orexin receptor type 2; ID: 3062                                            |
|    | <b>14</b> | <b>57377750-57378048</b>   | <b>70%, 1.7 monomer</b>  | <b>DNA primase subunit 2 (PRIM2 ID: 5558) intron</b>                                              |
| 7  | <b>15</b> | <b>1519232-1519571</b>     | <b>86%, 2 monomers</b>   | <b>14850 bp at 5' side: integrator complex subunit 1 (INTS ID: 26173)</b>                         |
|    |           |                            |                          | <b>19622 bp at 3' side: transcription factor MafK, (MAFK ID: 7975)</b>                            |
| 8  | <b>16</b> | <b>132864579-132864640</b> | <b>72%, 0.5 monomer</b>  | <b>15772 bp at 5' side: PHD finger protein 20-like protein 1 isoform X10; (PHF20L1 ID: 51105)</b> |
|    |           |                            |                          | <b>2361 bp at 3' side: thyroglobulin precursor, (TG ID: 7038)</b>                                 |
| 10 | <b>17</b> | <b>707868-707956</b>       | <b>94%, 0.5 monomer</b>  | <b>18158 bp at 5' side: DIP2C disco interacting protein 2 homolog C; (DIP2C ID: 22982)</b>        |
|    |           |                            |                          | 104970 bp at 3' side: Ia-related protein 4B isoform X2; ID: 23185                                 |
|    | <b>18</b> | <b>17653288-17653378</b>   | <b>76%, 0.5 monomer</b>  | <b>signal transducing adapter molecule 1; (STAM ID: 8027), intron</b>                             |
|    | <b>19</b> | <b>72939326-72939731</b>   | <b>74%, 2.4 monomer</b>  | <b>phospholipase A2 group XIIB; (PLA2G12B, ID: 84647), intron</b>                                 |
| 11 | <b>20</b> | <b>6810439-6810612</b>     | <b>86%, 1 monomer</b>    | <b>14531 bp at 5' side: olfactory receptor 6A2, (OR6A2 ID:338755)</b>                             |
|    |           |                            |                          | <b>35071 bp at 3' side: olfactory receptor 10A5, (OR10A5 ID: 338755)</b>                          |
|    | <b>21</b> | <b>85431074-85431184</b>   | <b>85%, 0.7 monomer</b>  | <b>discs large homolog 2, (DLG2 ID: 1740), intron</b>                                             |
| 13 | 22        | 23423970-23424059          | 71%, 0.5 monomer         | 12731 bp at 5' side: saccin isoform X2; ID: 26278                                                 |
|    |           |                            |                          | 166125 bp at 3' side: tumor necrosis factor receptor superfamily member 19 isof; ID: 55504        |
|    | 23        | 23424792-23424872          | 71%, 0.5 monomer         | 13553 bp at 5' side: saccin isoform X2, ID: 26278                                                 |

|    |           |                          |                          |                                                                                                           |
|----|-----------|--------------------------|--------------------------|-----------------------------------------------------------------------------------------------------------|
|    |           |                          |                          | 165312 bp at 3' side: tumor necrosis factor receptor superfamily member 19 isof., ID: 55504               |
| 15 | 24        | 24754024-24754329        | 70%, 1.8 monomers        | 74686 bp at 5' side: nuclear pore-associated protein 1, ID: 23742                                         |
|    |           |                          |                          | 200720 bp at 3' side: SNRPN upstream reading frame protein, ID: 6638                                      |
|    | <b>25</b> | <b>59219764-59219973</b> | <b>88%, 1.2 monomers</b> | <b>myosin IE (MYO1E, ID: 4643), intron</b>                                                                |
|    | 26        | 93907560-93907673        | 79%, 0.7 monomer         | 700821 bp at 5' side: putative uncharacterized protein UNQ9370/PRO34162; ID: 105370980                    |
|    |           |                          |                          | 390593 bp at 3' side: MCTP2 multiple C2 domains, transmembrane 2, ID: 55784                               |
|    | 27        | 93907750-93907849        | 77%, 0.6 monomer         | 701011 bp at 5' side: putative uncharacterized protein UNQ9370/PRO34162, ID: 105370980                    |
|    |           |                          |                          | 390417 bp at 3' side: multiple C2 and transmembrane domain-containing protein 2, ID: 55784                |
| 19 | <b>28</b> | <b>6819160-6819369</b>   | <b>70%, 1.2 monomers</b> | <b>vav guanine nucleotide exchange factor 1, (VAV, ID: 7409), intron</b>                                  |
|    | <b>29</b> | <b>23661142-23661242</b> | <b>86%, 0.6 monomer</b>  | <b>zinc finger protein 675, (ZNF675, ID: 171392), intron</b>                                              |
| X  | <b>30</b> | <b>402751-402878</b>     | <b>70%, 1 monomer</b>    | <b>16060 bp at 5' side: PPP2R3B protein phosphatase 2 regulatory subunit B''beta, (PPP2R3B ID: 28227)</b> |
|    |           |                          |                          | 228020 bp at 3' side: short stature homeobox protein isoform SHOXb, ID: 6473                              |
|    | <b>31</b> | <b>20101282-20101513</b> | <b>71%, 1.3 monomers</b> | <b>MAP7 domain containing 2 (MAP7D2, ID: 256714), intron</b>                                              |

**Table S4.** Expression of genes associated with dispersed alpha satellite repeats after HS in the presence and in the absence of chaetocin, inhibitor of histone methyltransferase Suv39H1. The expression is monitored immediately after heat stress (HS) and the level of upregulation relative to the control without chaetocin is shown. The P-values are calculated using the unpaired t-test.

| Gene name            | Cell line  | The level of upregulation (X) after chaetocin and P values |
|----------------------|------------|------------------------------------------------------------|
| <i>ZNF675</i>        | MJ90 hTERT | 1.50 (0.012)                                               |
| <i>NR3C1</i>         | MJ90 hTERT | 1.61 (0.013)                                               |
| <i>SLC30A6</i>       | MJ90 hTERT | 1.62 (0.008)                                               |
| <i>HTRA3</i>         | MJ90 hTERT | 1.32 (0.009)                                               |
| <i>PRIM</i>          | MJ90 hTERT | 1.31 (0.011)                                               |
| <i>INTS1</i>         | MJ90 hTERT | 1.50 (0.007)                                               |
| <i>STAM</i>          | MJ90 hTERT | 1.30 (0.008)                                               |
| <i>MYO1E</i>         | MJ90 hTERT | 1.81 (0.011)                                               |
| <i>SLC40A1</i>       | MJ90 hTERT | 2.00 (0.013)                                               |
| <i>ASNSD1</i>        | MJ90 hTERT | 2.30 (0.005)                                               |
| <i>ST6GAL1</i>       | MJ90 hTERT | 2.08 (0.007)                                               |
| <i>ACOX3</i>         | MJ90 hTERT | 1.70 (0.013)                                               |
| <i>PHF20L1</i>       | MJ90 hTERT | 1.30 (0.009)                                               |
| <i>DIP2C</i>         | MJ90 hTERT | 1.55 (0.008)                                               |
| <i>ZNF675</i>        | Cal 27     | 0.95 (0.176)                                               |
| <i>NR3C1</i>         | Cal 27     | 1.60 (0.011)                                               |
| <i>ZNF675</i>        | OV-90      | 1.00 (0.122)                                               |
| <i>NR3C1</i>         | OV-90      | 1.70 (0.010)                                               |
| <i>ZNF675</i>        | HepG2      | 1.55 (0.013)                                               |
| <i>NR3C1</i> - alpha | HepG2      | 1.05 (0.085)                                               |
| <i>NR3C1</i> + alpha | HepG2      | 1.70 (0.015)                                               |
